# Supplementary material for: Biomarkers are used to predict quantitative metabolite concentration profiles in human red blood cells
Source: PubMed Central journal article supplement (PMC5358888; doi:10.1371/journal.pcbi.1005424), 2017-03-06

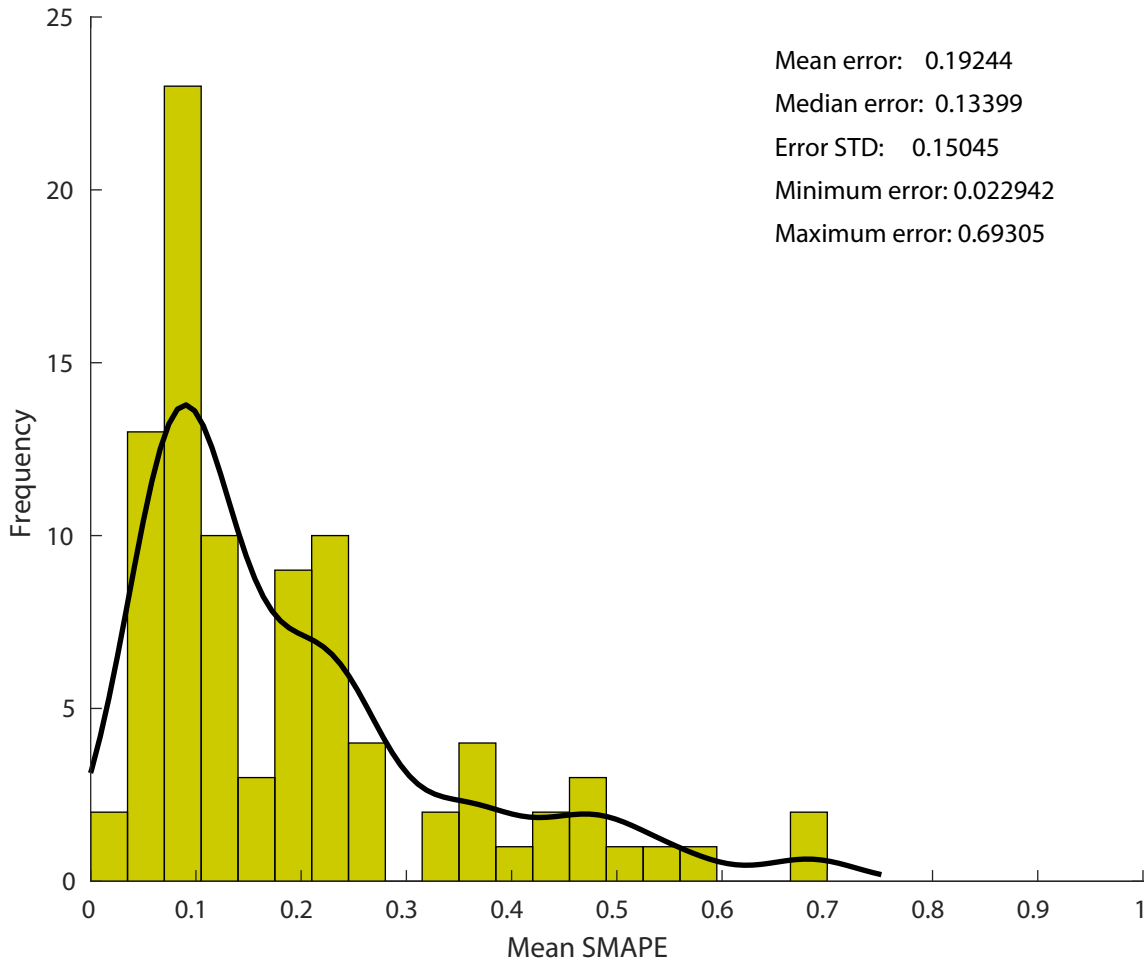

Supplement: pcbi.1005424.s004.pdf [file pcbi.1005424.s004.pdf]
