# Supplementary material for: Biomarkers are used to predict quantitative metabolite concentration profiles in human red blood cells
Source: PubMed Central journal article supplement (PMC5358888; doi:10.1371/journal.pcbi.1005424), 2017-03-06
Supplement: pcbi.1005424.s006.pdf [file pcbi.1005424.s006.pdf]

Predicted 6pgc[c]

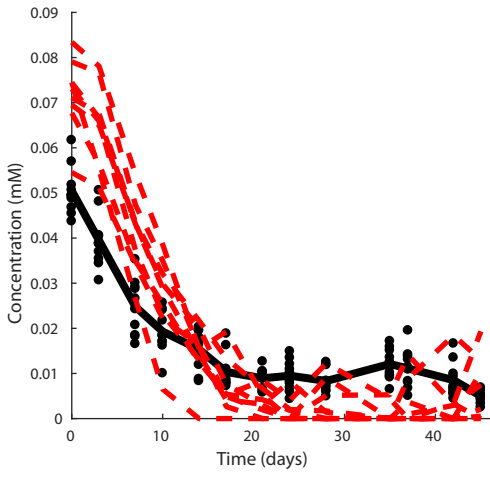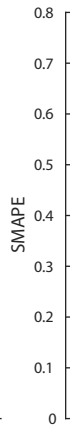

Predicted adp[c]

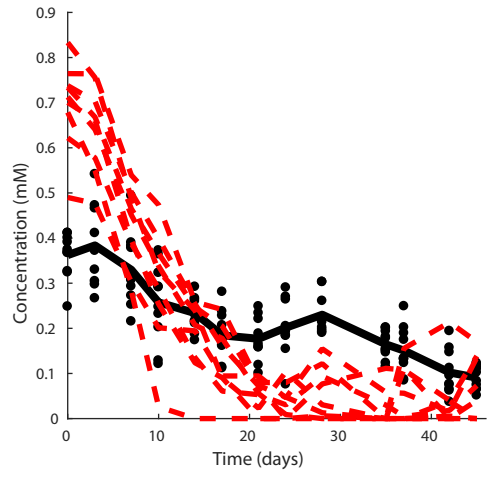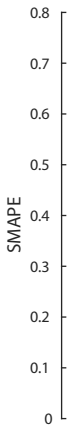

Predicted ins[c]

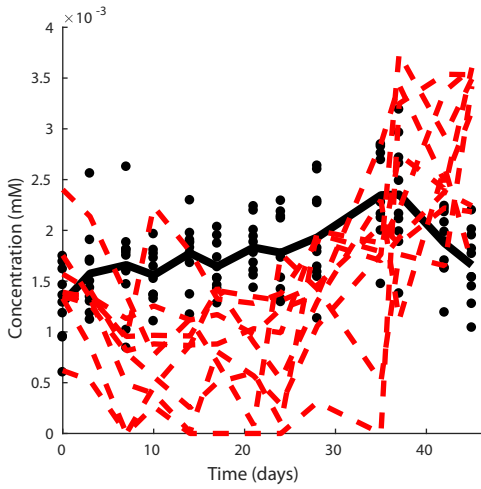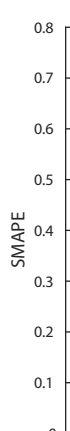

Predicted r5p[c]

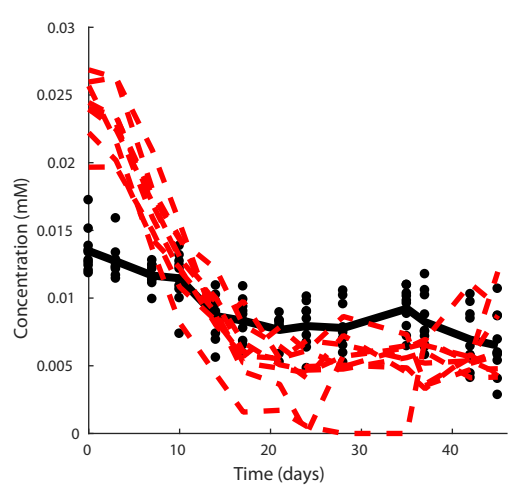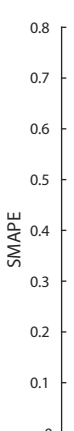

Predicted ru5p-D[c]

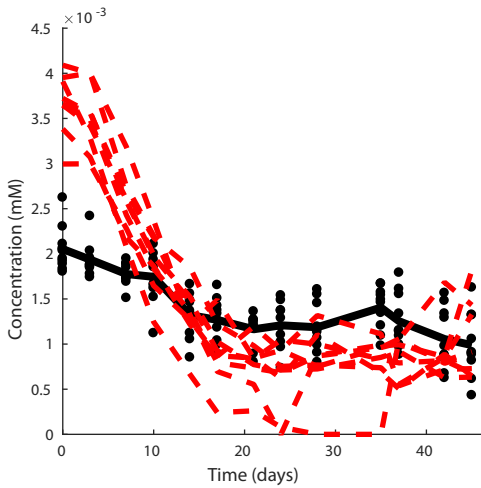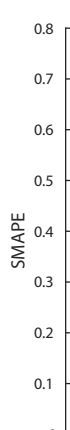

Predicted xu5p-D[c]

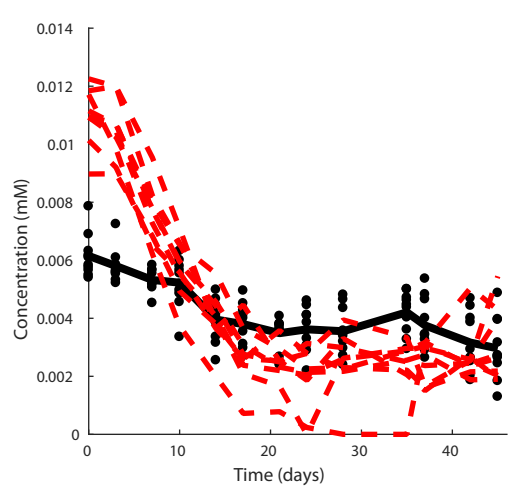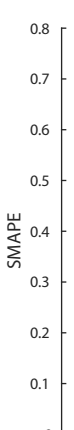

Predicted udpg[c]

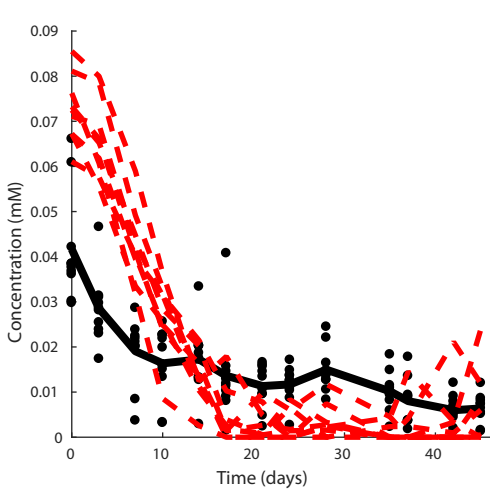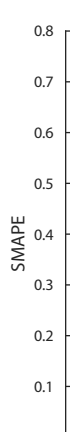

● Measured — Predicted
