# Supplementary material for: Biomarkers are used to predict quantitative metabolite concentration profiles in human red blood cells
Source: PubMed Central journal article supplement (PMC5358888; doi:10.1371/journal.pcbi.1005424), 2017-03-06
Supplement: pcbi.1005424.s015.pdf [file pcbi.1005424.s015.pdf]

**23dpg[c]**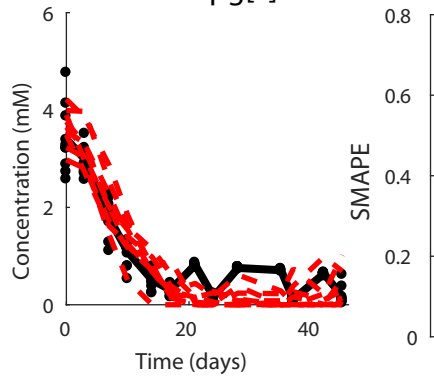
**atp[c]**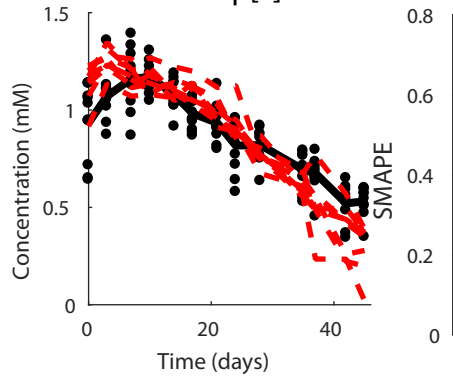
**cl[e]**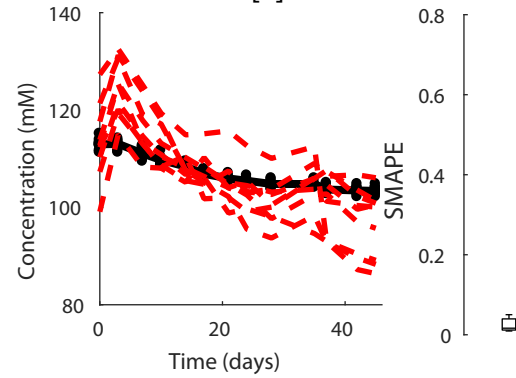
**k[e]**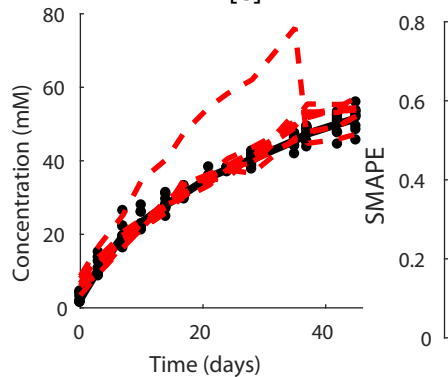
**nadp[c]**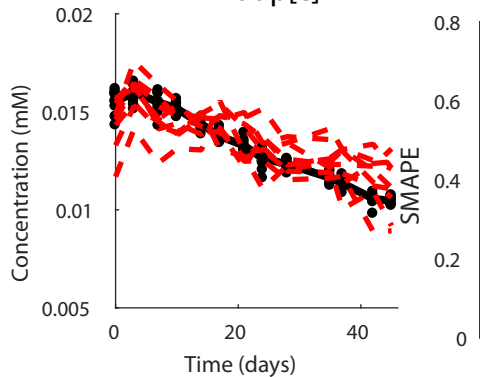
**nadph[c]**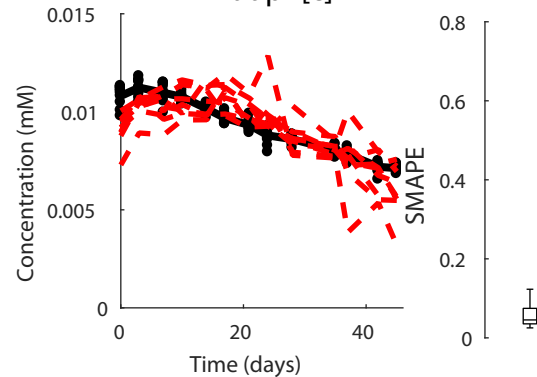
**na1[e]**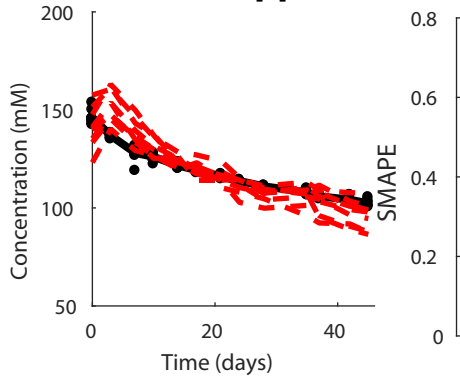

● Measured    - Predicted
